# Supplementary material for: Insufficient Ratio of Long-Lasting Insecticidal Nets to Household Members Limited Universal Usage in Western Kenya: A 2015 Cross-Sectional Study
Source: PubMed Central journal article supplement (PMC7941599; doi:10.4269/ajtmh.19-0119), 2020-04-20
Supplement: tpmd190119.SD1.pdf [file tpmd190119.SD1.pdf]

**Supplemental Table 1. Predictors of households in western Kenya that did not own any nets during a 2015 cross-sectional survey**

|                                                        | Highlands                 |                          |                                   | Lowlands                 |                          |                                   |
|--------------------------------------------------------|---------------------------|--------------------------|-----------------------------------|--------------------------|--------------------------|-----------------------------------|
|                                                        | Total<br>n                | No nets<br>n (%)         | Crude OR <sup>1</sup><br>(95% CI) | Total<br>n               | No nets<br>n (%)         | Crude OR <sup>1</sup><br>(95% CI) |
| <b>Households</b>                                      | 643                       | 203 (31.6%)              |                                   | 574                      | 11 (1.9%)                |                                   |
| <i>Household member composition</i>                    |                           |                          |                                   |                          |                          |                                   |
| <b>Number of household members</b>                     | Mean: 4.26<br>Range: 1-12 | Mean: 4.09<br>Range: 1-9 | 0.95 (0.88 – 1.03)                | Mean: 2.92<br>Range: 1-9 | Mean: 2.09<br>Range: 1-5 | 0.70 (0.44 – 1.10)                |
| 1 – 2                                                  | 161                       | 56 (34.8%)               | 1.00 (ref)                        | 276                      | 8 (2.9%)                 | 1.00 (ref)                        |
| 3 – 4                                                  | 199                       | 63 (31.7%)               | 0.87 (0.56 – 1.35)                | 190                      | 2 (1.1%)                 | 0.36 (0.08 – 1.70)                |
| 5 – 6                                                  | 177                       | 55 (31.1%)               | 0.85 (0.54 – 1.33)                | 85                       | 1 (1.2%)                 | 0.40 (0.05 – 3.24)                |
| >6                                                     | 106                       | 29 (27.4%)               | 0.71 (0.41 – 1.21)                | 23                       | 0 (0.0%)                 | 0 (N/A)                           |
| <b>Child under 5 years living in house</b>             |                           |                          |                                   |                          |                          |                                   |
| No                                                     | 367                       | 111 (30.2%)              | 1.00 (ref)                        | 395                      | 10 (2.5%)                | 1.00 (ref)                        |
| Yes                                                    | 276                       | 92 (33.3%)               | 1.15 (0.83 – 1.61)                | 179                      | 1 (0.6%)                 | 0.22 (0.03 – 1.70)                |
| <b>School-age child (5 – 15 years) living in house</b> |                           |                          |                                   |                          |                          |                                   |
| No                                                     | 233                       | 80 (34.3%)               | 1.00 (ref)                        | 311                      | 7 (2.3%)                 | 1.00 (ref)                        |
| Yes                                                    | 410                       | 123 (30.0%)              | 0.82 (0.58 – 1.16)                | 263                      | 4 (1.5%)                 | 0.67 (0.19 – 2.32)                |
| <b>Perceived malaria severity</b>                      |                           |                          |                                   |                          |                          |                                   |
| Low                                                    | 179                       | 62 (34.6%)               | 1.00 (ref)                        | 75                       | 3 (4.0%)                 | 1.00 (ref)                        |
| Moderate                                               | 388                       | 113 (29.1%)              | 0.78 (0.53 – 1.13)                | 211                      | 5 (2.4%)                 | 0.58 (0.14 – 2.50)                |
| High                                                   | 64                        | 23 (35.9%)               | 1.06 (0.58 – 1.92)                | 286                      | 3 (1.0%)                 | 0.25 (0.05 – 1.29)                |
| <i>Socioeconomic status</i>                            |                           |                          |                                   |                          |                          |                                   |
| <b>Asset ownership quartile</b>                        |                           |                          |                                   |                          |                          |                                   |
| Low                                                    | 165                       | 67 (40.6%)               | <b>2.01 (1.22 – 3.32)</b>         | 123                      | 8 (6.5%)                 | <b>6.57 (1.37 – 31.50)</b>        |
| Second                                                 | 217                       | 66 (30.4%)               | 1.29 (0.79 – 2.10)                | 100                      | 0 (0.0%)                 | 0 (N/A)                           |
| Third                                                  | 128                       | 34 (26.6%)               | 1.06 (0.61 – 1.86)                | 160                      | 1 (0.6%)                 | 0.59 (0.05 – 6.62)                |
| High                                                   | 130                       | 33 (25.4%)               | 1.00 (ref)                        | 191                      | 2 (1.0%)                 | 1.00 (ref)                        |
| <b>Education of the female head of household</b>       |                           |                          |                                   |                          |                          |                                   |
| None or some primary                                   | 316                       | 90 (28.5%)               | 1.00 (ref)                        | 222                      | 5 (2.3%)                 | 1.00 (ref)                        |
| Completed primary but not secondary                    | 218                       | 70 (32.1%)               | 1.19 (0.82 – 1.73)                | 237                      | 2 (0.8%)                 | 0.35 (0.07 – 1.85)                |
| Completed secondary                                    | 50                        | 10 (20.0%)               | 0.63 (0.30 – 1.31)                | 47                       | 1 (2.1%)                 | 0.94 (0.11 – 8.27)                |
| No female head or other education                      | 51                        | 29 (56.9%)               | <b>3.31 (1.81 – 6.07)</b>         | 51                       | 3 (5.9%)                 | 2.71 (0.63 – 11.74)               |

|                                                 | Highlands  |                  |                                   | Lowlands   |                  |                                   |
|-------------------------------------------------|------------|------------------|-----------------------------------|------------|------------------|-----------------------------------|
|                                                 | Total<br>n | No nets<br>n (%) | Crude OR <sup>1</sup><br>(95% CI) | Total<br>n | No nets<br>n (%) | Crude OR <sup>1</sup><br>(95% CI) |
| <b>Can afford to buy a net if not given one</b> |            |                  |                                   |            |                  |                                   |
| No                                              | 198        | 83 (41.9%)       | <b>1.96 (1.38 – 2.79)</b>         | 73         | 6 (8.2%)         | <b>8.76 (2.60 – 29.49)</b>        |
| Yes                                             | 442        | 119 (26.9%)      | 1.00 (ref)                        | 494        | 5 (1.0%)         | 1.00 (ref)                        |
| <b><i>Structure characteristics</i></b>         |            |                  |                                   |            |                  |                                   |
| <b>Main building quality<sup>2</sup></b>        |            |                  |                                   |            |                  |                                   |
| Low                                             | 52         | 26 (50.0%)       | <b>2.89 (1.52 – 5.48)</b>         | 200        | 4 (2.0%)         | 0.66 (0.12 – 3.71)                |
| Moderate                                        | 412        | 132 (32.0%)      | 1.36 (0.92 – 2.03)                | 294        | 5 (1.7%)         | 0.56 (0.11 – 2.96)                |
| High                                            | 175        | 45 (25.7%)       | 1.00 (ref)                        | 67         | 2 (3.0%)         | 1.00 (ref)                        |
| <b>Vegetation around house</b>                  |            |                  |                                   |            |                  |                                   |
| None/bare ground                                | 36         | 15 (41.7%)       | 1.00 (ref)                        | 191        | 1 (0.5%)         | 1.00 (ref)                        |
| Short maintained grass                          | 366        | 112 (30.6%)      | 0.62 (0.31 – 1.24)                | 141        | 4 (2.8%)         | 5.55 (0.61 – 50.18)               |
| Medium grass and bushes                         | 220        | 65 (29.5%)       | 0.59 (0.29 – 1.21)                | 168        | 3 (1.8%)         | 3.45 (0.36 – 33.53)               |
| Long grass and bushes                           | 17         | 10 (58.8%)       | 2.00 (0.62 – 6.45)                | 58         | 2 (3.4%)         | 6.79 (0.60 – 76.22)               |

CI = Confidence interval; OR = Odds ratio

1 Odds that the household does not own any nets.

2 Building quality was based on an index variable calculated from the total number of finished materials used among the walls, floor, and roof of the structure (0, 1, 2, or 3) with an adjustment based on the field worker's rating of household quality on a scale of 1 – 5. Households receiving the median value of the index score (2.5) were defined as 'moderate' quality, while those below and above were respectively defined as "low" or "high" quality.
